# Supplementary material
Source: Springer Nature journal article supplement (https://www.springermedizin.de/resource/supplementary/13054_2013_3029_MOESM1_ESM.pdf/9712432)
Supplement: MOESM1 [file 9712432]

**Admitted in the ICU  
n=1692**

**Intra-abdominal infection and Septic shock  
n=114**

**Patients meeting the inclusion  
criteria n=101**

**First line of treatment  
success  
n=65**

**Survivors  
n=63**

**First line of treatment  
failure  
n=36**

**Survivors  
n=9**

**Patients not meeting the  
inclusion criteria  
n=1578**

**Length of stay in the ICU  
less than 2 days  
n=13**

**Survivors  
n=3**
